# Supplementary material for: An ultrasensitive “mix-and-detect” kind of fluorescent biosensor for malaoxon detection using the AChE-ATCh-Ag-GO system
Source: Royal Society of Chemistry journal article supplement (doi:10.1039/d3ra02253f), 2023-01-01
Supplement: d3ra02253f1.pdf [file d3ra02253f1.pdf]

**An ultrasensitive “mix-and-detect” kind of fluorescent biosensor for malaoxon detection  
using the AChE-ATCh-Ag-GO system**

Vinotha Alex A, Amitava Mukherjee\*

Centre for Nanobiotechnology, Vellore Institute of Technology, Vellore, India.

**Supplementary Information**

\*Corresponding author

Dr. Amitava Mukherjee

Senior Professor & Director

Centre for Nanobiotechnology

Vellore Institute of Technology, Vellore – 632014, India.

Email: [amit.mookerjea@gmail.com](mailto:amit.mookerjea@gmail.com), [amitav@vit.ac.in](mailto:amitav@vit.ac.in)

Phone: 91 416 2202620

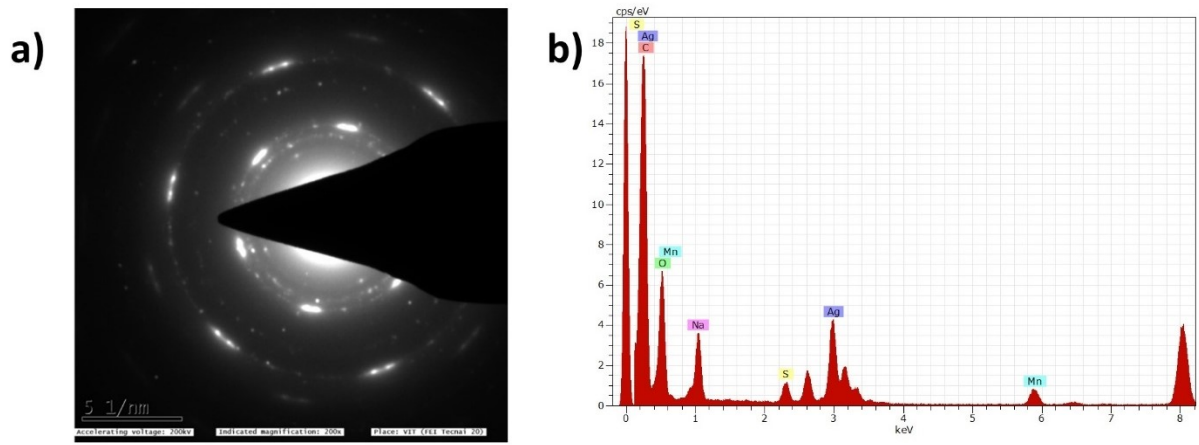

**Fig. S1.** a) SAED pattern of Ag-GO nanocomposite, b) EDX analysis of Ag-GO.

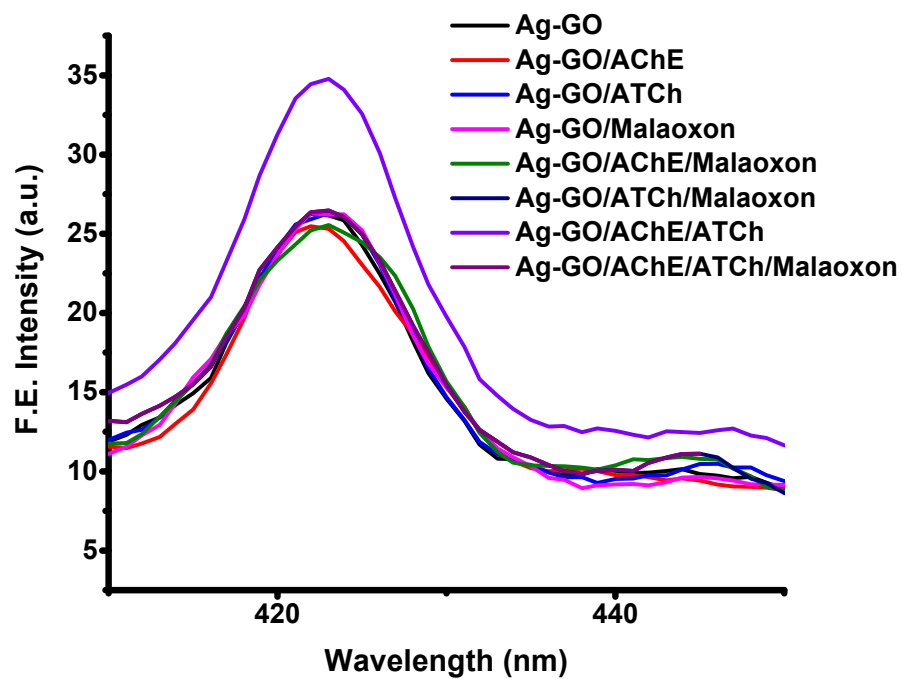

**Fig. S2.** Effect of the separate, as well as a mixture of reactants in AgNPs aggregation on GO sheet

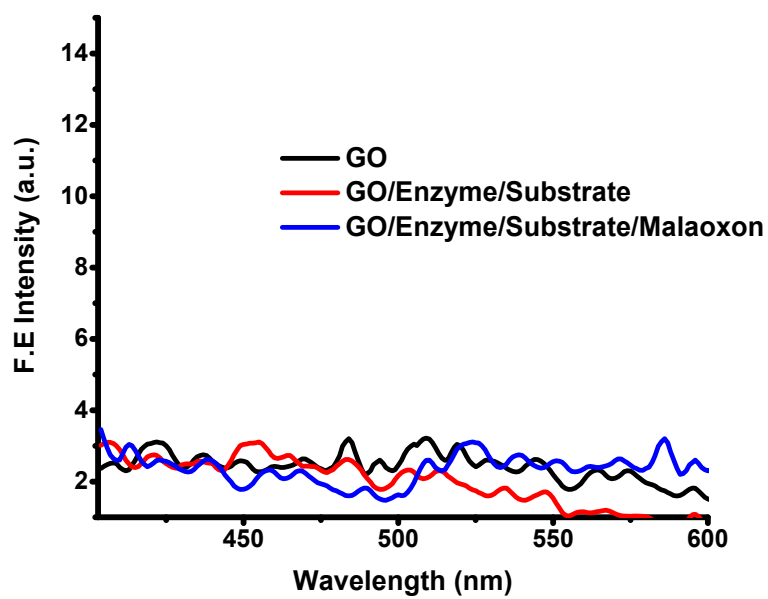

**Fig. S3.** Effect of the mixture of reactants such as enzyme/substrate/malaoxon, and enzyme/substrate, on the bare GO sheet

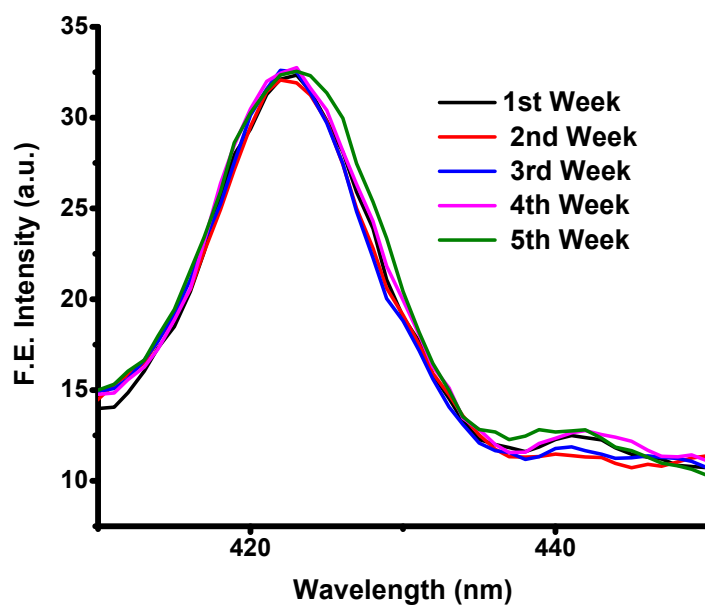

**Fig. S4.** Stability evaluation of the Ag-GO nanohybrid in the presence of enzyme, substrate malaoxon (0.001 pM).

**Table S1. F.E intensity (mean  $\pm$  SD) values at various malaoxon concentrations**

| Malaoxon Concentrations (pM) | F.E intensity (mean $\pm$ SD) |
|------------------------------|-------------------------------|
| 0.001                        | 32.3 $\pm$ 0.00011            |
| 0.01                         | 31.21 $\pm$ 0.023             |
| 0.1                          | 30.3 $\pm$ 0.030              |
| 1                            | 29.3 $\pm$ 0.009              |
| 10                           | 28.4 $\pm$ 0.010              |
| 100                          | 27.4 $\pm$ 0.008              |
| 1000                         | 26.4 $\pm$ 0.012              |

**Table S2. Summary of the ANOVA results**

|                                                |         |
|------------------------------------------------|---------|
| F                                              | 50735   |
| P value                                        | <0.0001 |
| P value summary                                | ****    |
| Significant difference among means (P < 0.05)? | Yes     |
| R square                                       | 1       |

**Table S3. F.E intensity (mean  $\pm$  SD) values of malaoxon and other interferents**

| Target analyte and Interferents | F.E intensity (mean $\pm$ SD) |
|---------------------------------|-------------------------------|
| Malaoxon                        | 32.31 $\pm$ 0.28              |
| Fenthion                        | 35.44 $\pm$ 0.35              |
| Trichlorfon                     | 34.88 $\pm$ 0.49              |
| Urea                            | 36.95 $\pm$ 0.22              |
| Methiocarb                      | 35.2 $\pm$ 0.17               |
| Permethrin                      | 35.02 $\pm$ 0.41              |
| Temephos                        | 34.77 $\pm$ 0.19              |



**Table S4. Statistical performance of the sensor for detection of malaoxon**

| Concentration (pM) | RSD % (n=3) |            |                |
|--------------------|-------------|------------|----------------|
|                    | Run-to-Run  | Day-to-Day | Batch-to-Batch |
| 0.001              | 0.00035     | 0.093513   | 0.108624       |
| 0.01               | 0.07426     | 0.153949   | 0.204437       |
| 0.1                | 0.09910     | 0.176291   | 0.203267       |
| 1                  | 0.03375     | 0.703608   | 0.943981       |
| 10                 | 0.038639    | 0.185774   | 0.305827       |
| 100                | 0.031617    | 0.09263    | 0.157231       |
| 1000               | 0.047945    | 0.195401   | 0.28021        |
